# Supplementary material for: Urban Pit-Building Insects Are Attracted to Walls for Multiple Reasons
Source: Biology (Basel). 2021 Jul 8;10(7):635. doi: 10.3390/biology10070635 (PMC8301029; doi:10.3390/biology10070635)
Supplement: Supplementary file 1 [file biology-10-00635-s001.zip › SupplementaryData.xlsx]

## Sheet: Main
Supplementary Data for the manuscript entitled:
Walls provide better microhabitats for urban pit-building predators for multiple reasons
Inon Scharf, Tomer Gilad, Yuval Taichman and Aziz Subach
Sheet title	Description
Pits	Pit locations relative to the wall in all seven sites.
Depths	Measurements of soil depths with increasing distances from the wall in all seven sites.
Areas	Pit areas in the field (and lab) as a function of soil depth and distance from the wall (four sites).
Particles	Soil particle sizes (four sites).
Light	Light measurements during the morning, afternoon and evening (all sites).
Arthropods	Arthropod abundance according to pitfall traps (two sites).
Simulation	The simulation model output, all scenarios tested.
Relocations	Wormlion relocations as a function of initial position next to the wall or at a distance of 40 cm (an experiment with four replications).

## Sheet: Pits
Pit locations relative to the wall in all seven sites. The wall location is marked with yellow.
In four photos there were two walls, and we referred to the nearest of the two to each pit. In two photos, there was a gap in the wall (one segment of the wall sticking out).
Green, photo 1								Green, photo 2								Green, photo 3								Gilman, photo 1								Gilman, photo 2								Gilman, photo 3								Buchmann-Mehta, photo 1
Pit #	X (pixels)	Y (pixels)	Dist. to wall (pixels)	Dist. to wall (cm)	Scale			Pit #	X (pixels)	Y (pixels)	Dist. to wall (pixels)	Dist. to wall (cm)	Scale			Pit #	X (pixels)	Y (pixels)	Dist. to wall (pixels)	Dist. to wall (cm)	Scale			Pit #	X (pixels)	Y (pixels)	Dist. to wall (pixels)	Dist. to wall (cm)	Scale			Pit #	X (pixels)	Y (pixels)	Dist. to wall (pixels)	Dist. to wall (cm)	Scale			Pit #	X (pixels)	Y (pixels)	Dist. to wall (pixels)	Dist. to wall (cm)	Scale			Pit #	X (pixels)
1	631	145.333	736.333	75.5147	pixels	cm		1	507	849	820.333	90.1798	Pixels	cm		1	1108	317	197.333	20.8941	Pixels	cm		5	118.5	462	255.333	21.9481	Pixels	cm		69	222.667	358	123.333	11.7468	Pixels	cm		1	121.333	168	22	1.89186	Pixels	cm		1	161.333
2	813	134.667	554.333	56.8497	487.543	50		2	528.333	845	799	87.8347	909.664	100		2	1279	414	26.333	2.7882	850	90		1	137	443.5	236.833	20.3578	1163.35	100		70	242	248	13.333	1.2699	524.963	50		2	166.667	160	14	1.20391	814.015	70		2	204
3	927.667	248	439.666	45.09				3	529.333	506	798	87.7248				3	1286	607	19.333	2.04702				7	146.5	568	361.333	31.0597				72	267.333	501.333	266.666	25.3986				3	216.667	178.667	32.667	2.80915				3	274.667
4	963	194	404.333	41.4664	4 corners			4	444	533.333	883.333	97.1055	4 corners			4	1254	638	51.333	5.43526	4 corners			3	149	461	254.333	21.8621	4 corners			71	276.667	246	11.333	1.07941	4 corners			4	240.667	214.667	68.667	5.90492	4 corners			4	352.667
5	1029.67	189.333	337.666	34.6294	1369.33	81.333		5	508	260.667	819.333	90.0699	1334.67	72		5	1285.67	683.333	19.666	2.08228	1305.33	97.333		4	152	490	283.333	24.3549	for y<310			73	300	538.667	304	28.9544	for y < 615			5	300.667	210	64	5.50358	110.667	144		5	374.667
6	1135	182.667	232.333	23.8269	1365.33	1006.67		6	734	225.333	593.333	65.2256	1320	957.333		6	1254.33	745.333	51	5.4	1305.33	1024		2	166.5	435	228.333	19.6272	113.333	206.667		45	310	548.667	314	29.9069	222.667	238.667		6	341.333	194	48	4.12769	1318.67	148		6	322.667
7	1187	168	180.333	18.4941	436	1006.67		7	963.333	637	364	40.0148	436	964		7	1214.33	762.667	91	9.63529	378.667	1020		8	182	598.5	391.833	33.6814	305.333	206.667		68	310	363.333	128.666	12.2548	612	230.667		7	323.333	152.667	6.667	0.573319	1318.67	942.667		7	324
8	1235	196.667	132.333	13.5714	434.667	81.333		8	1008.67	597.667	318.666	35.0312	434.667	72		8	1237	805.333	68.333	7.23526	376	93.333		9	184.5	632	425.333	36.5611	for y>310 & y<1000			67	314	380.667	146	13.9057	for y >615			8	362.667	166	20	1.71987	109.333	940		8	316.667
9	1049.67	228	317.666	32.5783	wall point on x:			9	997.333	566.333	330	36.2772	wall point on x:			9	1224.33	846	81	8.57647	wall point on x:			6	191	525.5	318.833	27.4065	320	105.333		75	318.667	642.667	408	38.8599	616	112		9	496.667	189.333	43.333	3.72636				9	325.333
10	1143	238	224.333	23.0065	1367.33			10	936.667	402	390.666	42.9462	1327.33			10	1157.67	874.333	147.666	15.6352	1305.33			10	269.5	461.5	254.833	21.9051	1001.33	100		65	339.333	409.333	174.666	16.636	1302.67	113.333		10	548	192	46	3.9557	wall point on y:			10	459.333
11	1081	277.333	286.333	29.3649				11	1027.33	442.667	300	32.9793				11	1199.67	899.667	105.666	11.1882				11	281.5	503.5	296.833	25.5154	for y>1000			63	344	496	261.333	24.8906				11	542	229.333	83.333	7.1661	146			11	496
12	1089.67	356.667	277.666	28.4761				12	1096.67	641.333	230.667	25.3573				12	1233.67	882.333	71.666	7.58816				12	294.5	504.5	297.833	25.6013	1000	205.333		66	348	378	143.333	13.6517	wall point on y:			12	512.667	270	124	10.6632				12	427.333
13	1211	269.333	156.333	16.0327				13	1123.33	706	204	22.4259				13	1290.33	904.333	15	1.58824				16	339	688	585.333	50.3145				42	361.333	251.333	16.666	1.58735	112.666	x>615		13	562	187.333	41.333	3.55437				13	568.667
14	1243.67	268.667	123.666	12.6826				14	1138	742.667	189.333	20.8136				14	1281.67	921.667	23.666	2.50581				13	354.5	524	421.334	36.2173	wall point on y:			64	363.333	442	207.333	19.7474	234.667	x<615		14	608	181.333	35.333	3.03841				14	134
15	1273	318	94.333	9.67433				15	1174	787.333	153.333	16.8561				15	1235	955.667	70.333	7.44702				15	403	557	454.334	39.0539	206.222	(x<310 or x>1000)		74	367.333	582	347.333	33.0817				15	591.333	250.667	104.667	9.00068				15	214
16	1203	400	164.333	16.8532				16	1158.67	824	168.667	18.5416				16	1173	964.333	132.333	14.0117				14	406.5	524	421.334	36.2173	102.666	(x> 310 & x<1000)		62	385.333	485.333	250.666	23.8746				16	633.333	263.333	117.333	10.0899				16	140
17	1126.33	416	241	24.7158				17	1174.67	849.333	152.667	16.7827				17	1170.33	933	135	14.2941				17	473	536.5	433.834	37.2917				44	407.333	299.333	64.666	6.1591				17	654.667	259.333	113.333	9.7459				17	148.667
18	1073.67	422.667	293.666	30.1169				18	1237.33	862.667	90.0005	9.89382				18	552.333	243.333	753	79.7294				19	486	683.5	580.833	49.9277				61	411.333	540	305.333	29.0814				18	467.333	399.333	253.333	21.785				18	242
19	1029.67	438	337.666	34.6294				19	1203.33	754.667	124	13.6315				19	417	414	888.333	94.0588				18	516	578	475.334	40.859				43	421.333	278	43.333	4.12724				19	512	395.333	249.333	21.441				19	284.667
20	953	476.667	414.333	42.492				20	1302.67	730.667	24.6665	2.71161				20	927	856.333	378.333	40.0588				20	542.5	634	531.333	45.6727				41	424	254.667	20	1.9049				20	680.667	382.667	236.667	20.3518				20	330
21	957	540.667	410.333	42.0817				21	1229.33	702.667	98.0005	10.7733				21	739.667	979	565.666	59.894				21	593	540.5	437.834	37.6356				53	439.333	406.667	172	16.3821				21	729.333	344.333	198.333	17.0553				21	497.333
22	1259.67	476.667	107.666	11.0417				22	1252.67	688.667	74.6665	8.20814												22	617.5	539.5	436.834	37.5496				40	444.667	242	7.333	0.69843				22	778.667	178.333	32.333	2.78043				22	537.333
23	1195	629	172.333	17.6736				23	1276.67	660	50.6665	5.5698												23	648.5	544	441.334	37.9364				51	478	335.333	100.666	9.58791				23	820.667	152.333	6.333	0.544597				23	568
24	1095	673.667	272.333	27.9291				24	1313.33	638.667	14.0005	1.53908												25	661.5	612	509.334	43.7816				60	484	528.667	294	28.002				24	821.333	175.667	29.667	2.55117				24	589.333
25	1146.33	689.667	221	22.6647				25	1282	622.667	45.3335	4.98354												24	664	557	454.334	39.0539				54	485.333	426	191.333	18.2235				25	857.333	175	29	2.49381				25	513.333
26	1137	757.667	230.333	23.6218				26	1258	584	69.3335	7.62188												26	728.5	813.5	710.833	61.1023				52	489.333	347.333	112.666	10.7309				26	893.333	191	45	3.86971				26	583.333
27	1126.33	787.667	241	24.7158				27	1210.67	593.333	116.667	12.8252												27	791.5	458.5	355.834	30.587				57	493.333	478	243.333	23.1762				27	974.667	192.333	46.333	3.98434				27	626
28	1135	825.667	232.333	23.8269				28	1186	559.333	141.333	15.5369												28	840.5	460	357.334	30.7159				58	512.667	506.667	272	25.9066				28	1028	198.333	52.333	4.5003				28	320.5
29	1175.67	904	191.666	19.6563				29	1204.67	540	122.667	13.4848												30	914.5	569.5	466.834	40.1284				59	520.667	536	301.333	28.7004				29	1059	199.333	53.333	4.58629				29	696.667
30	1198.33	948.667	169	17.3318				30	1233.33	522.667	94.0005	10.3335												29	929	522.5	419.834	36.0883				78	536.667	706	471.333	44.892				30	1098.33	210.667	64.667	5.56094				30	708
31	1283	860	84.333	8.64878				31	1211.33	506.667	116	12.752												31	1012	437	231.667	19.9138				39	537.333	245.333	10.666	1.01588				31	1094.33	175.333	29.333	2.52245				31	751.333
32	1298.33	958.667	69	7.0763				32	1226.67	472	100.667	11.0663												40	1058.33	472	266.667	22.9223				77	540.667	676.667	442	42.0982				32	1139	186	40	3.43974				32	770
33	1211.67	989.333	155.666	15.9643				33	1310	481.333	17.3335	1.90548												41	1111.5	494	288.667	24.8134				55	542.667	410	175.333	16.6996				33	1114.33	180.667	34.667	2.98114				33	663.333
34	960.333	762.667	407	41.7399				34	1302	427.333	25.3335	2.78493												35	1172	227.5	22.167	1.90545				79	566	706.667	472	44.9555				34	1218.33	179.333	33.333	2.86642				34	608
35	976.333	864	391	40.099				35	1270.67	411.333	56.6665	6.22939												33	1205.5	360.5	155.167	13.3379				46	583.333	322.667	88	8.38154				35	1250.33	174.667	28.667	2.46518				35	568.667
36	903	794.667	464.333	47.6197				36	1260.67	450.667	66.6665	7.32869												34	1233.5	326.5	121.167	10.4154				38	586.667	278.667	44	4.19077				36	1185.67	549	403	34.6554				36	929.333
37	839.667	792	527.666	54.1148				37	1218.67	424	108.667	11.9458												32	1265.5	558	352.667	30.3148				56	596	426.667	192	18.287				37	746.333	603	457	39.299				37	930
38	803	822	564.333	57.8752				38	1181.33	397.333	146	16.0499												37	1297.5	298.5	93.167	8.00851				50	600.667	373.333	138.666	13.2072				38	718.333	583.667	437.667	37.6365				38	1095
39	812.333	848.667	555	56.9181				39	1164	462	163.333	17.9554												36	1301	234.5	29.167	2.50716				80	602	690.667	456	43.4316				39	619.667	620.333	474.333	40.7896				39	1115.5
40	751	891.333	616.333	63.2081				40	1169.33	425.333	158	17.3691												38	1313.5	307.5	102.167	8.78214				49	616.667	363.333	250.667	23.8747				40	647	781	635	54.6059				40	1088.5
41	801.667	922.667	565.666	58.0119				41	1134	410	193.333	21.2533												39	1320.5	421	215.667	18.5384				1	621.333	178.667	66.0005	6.2862				41	681	808.333	662.333	56.9563				41	1121.5
42	764.333	953.333	603	61.8407				42	1116	331.667	211.333	23.232																				76	624	568.667	456.001	43.4317				42	793	517.667	371.667	31.9609				42	1112.5
43	712.333	923.333	655	67.1736				43	1146.67	330.333	180.667	19.8608																				47	628.667	346.667	234	22.2873				43	446.667	459.333	313.333	26.9446				43	1098
44	733	956	634.333	65.0541				44	1188	311.667	139.333	15.317																				3	632	166	53.3335	5.07974				44	1278	615	469	40.331				44	1051
45	667	957.333	700.333	71.8227				45	1230	297.667	97.3335	10.6999																				2	635.333	184	71.3335	6.79415												45	1076
46	590.333	785.333	777	79.6853				46	1312	369	15.3335	1.68562																				37	636	265.333	152.667	14.5407												46	1114
47	454.333	875.333	913	93.6328				47	1267.33	301.667	60.0005	6.5959																				48	638	371.333	258.667	24.6366												47	1052.5
48	541.667	197.333	825.666	84.6763				48	1274	268.333	53.3335	5.86299																				4	659.333	151.333	38.6665	3.68278												48	994.5
49	1162.33	767	205	21.0238				49	1250	258.333	77.3335	8.50133																				5	662.667	119.333	6.6665	0.63495												49	888
50	639.667	971	727.666	74.6259				50	1168	259.667	159.333	17.5156																				6	674	138.667	26.0005	2.47641												50	1107
								51	1193.33	217.667	134	14.7308																				36	682.667	309.333	196.667	18.7315												51	1156.33
								52	1230	220.333	97.3335	10.6999																				35	708.667	334	221.334	21.0809												52	1191
								53	1283.33	231	44.0005	4.83701																				7	719.333	121.333	8.6665	0.825439												53	1177
								54	1277.33	182.667	50.0005	5.49659																				34	738	255.667	143	13.6201												54	1184.33
								55	1246	172.667	81.3335	8.94105																				31	739.333	529.333	416.666	39.6853												55	1174.33
								56	1207.33	147.333	120	13.1917																				9	754	214	101.334	9.65149												56	978.333
								57	1211.33	123.333	116	12.752																				8	759.333	124	11.3335	1.07946												57	983
								58	1235.33	120	92.0005	10.1137																				32	778.667	484	371.334	35.3676												58	980.333
								59	1276.67	103.333	50.6665	5.5698																				10	816	202	89.3335	8.50855												59	707
																																30	819.333	652.667	540	51.4322												60	664
																																81	832.667	709.333	596.666	56.8294												61	685.5
																																82	848	738	625.333	59.5598
																																33	864	312	199.334	18.9855
																																11	876.667	160.667	48.0005	4.5718
																																29	888	466	353.334	33.6532
																																84	906	201	88.3335	8.41331
																																12	991.333	128.667	16.0005	1.52396
																																13	1037.33	119.333	6.6665	0.63495
																																14	1078.67	124	11.3335	1.07946
																																22	1080	265.333	152.667	14.5407
																																27	1103.33	562	449.334	42.7967
																																23	1113.33	468.667	356	33.9072
																																15	1116.67	191.333	78.6665	7.49258
																																21	1144	260	147.334	14.0328
																																25	1147.33	582.667	470.001	44.7651
																																16	1156	235.333	122.666	11.6833
																																26	1156	630.667	518	49.3369
																																24	1170	509.333	396.667	37.7804
																																17	1171.33	242.667	130	12.3819
																																28	1204.67	246	133.334	12.6993
																																18	1210	123.333	10.6665	1.01593
																																83	1226	702	589.333	56.131
																																19	1252	184	71.3335	6.79415
																																85	1290	279	166.334	15.8424
																																20	1291.33	192.667	80.0005	7.61963
[truncated: 76 more columns]

## Sheet: Depths
Measurements of soil depths with increasing distances from the wall in all seven sites.
Depths were measured in an increasing distance from the wall, at the microhabitat center, in two rows, with 10-cm distance in-between the two.
Green, photo 1				Gilman, photo 1				Buchmann-Mehta, photo 1				Mexico, photo 1				Britannia, photo 1				Central library, photo 1				Schreiber, photo 1
Distance from the wall (cm)	Sand depth 1 (mm)	Sand depth 2 (mm)		Distance from the wall (cm)	Sand depth 1 (mm)	Sand depth 2 (mm)		Distance from the wall (cm)	Sand depth 1 (mm)	Sand depth 2 (mm)		Distance from the wall (cm)	Sand depth 1 (mm)	Sand depth 2 (mm)		Distance from the wall (cm)	Sand depth 1 (mm)	Sand depth 2 (mm)		Distance from the wall (cm)	Sand depth 1 (mm)	Sand depth 2 (mm)		Distance from the wall (cm)	Sand depth 1 (mm)	Sand depth 2 (mm)
2	61.55	84.82		2	24.65	31.72		2	22.49	12.87		2	58.25	38.23		2	17.82	11.57		2	55.6	56.09		2	105.23	56.05
10	41.76	47.54		8	71.73	39.17		10	73.83	46.32		10	70.76	66.36		10	17.49	11.08		10	50.59	31.76		7	99.54	94.63
20	73.3	27.11		16	48.07	31.45		20	27.71	44.88		20	26.61	41.84		20	9.4	12.83		20	39.93	72.27		12	89.81	72.22
30	30.94	23.96		24	26.49	35.7		30	18.96	40.92		30	25.64	47.1		30	3.27	10.48		30	30.12	28.63		17	48.7	42.29
40	14.06	24.97		32	144.79	96.93		40	40.04	13.91		40	39.8	22.38		40	5.12	4.85		40	28	20.79		22	76.23	89.05
50	10.5	10.04		40	23.37	94.77		50	17.68	19.52		50	23.33	36.54		50	5.32	4.22		50	18.3	19.91		27	91.28	41
60	10.22	8.24		48	32.63	86.81		60	52.2	54.67		60	27.93	26.17		60	6.68	9.19		60	21.56	37.16		32	28.48	42.22
70	33.48	30.37		56	49.96	36.4		70	65.71	60.98		70	17.03	18.88		70	9.21	8.17		70	27.88	38.59		37	90.21	38.8
80	24.46	16.06		64	63.21	52		80	80.22	47.85		80	29.04	38.09		80	12.42	8.7		80	31.5	30.79		42	139.96	108.45
90	34.73	22.48		72	51.23	10.58		90	91.23	105.04		90	19.98	22.02						90	36.61	49.81
100	22.13	31.91		80	79.03	66.17		100	74.95	114.5		100	10.31	23.01						100	39.63	44.14
Green, photo 2				Gilman, photo 2								Mexico, photo 2				Britannia, photo 2				Central library, photo 2				Schreiber, photo 2
Distance from the wall (cm)	Sand depth 1 (mm)	Sand depth 2 (mm)		Distance from the wall (cm)	Sand depth 1 (mm)	Sand depth 2 (mm)						Distance from the wall (cm)	Sand depth 1 (mm)	Sand depth 2 (mm)		Distance from the wall (cm)	Sand depth 1 (mm)	Sand depth 2 (mm)		Distance from the wall (cm)	Sand depth 1 (mm)	Sand depth 2 (mm)		Distance from the wall (cm)	Sand depth 1 (mm)	Sand depth 2 (mm)
2	62.24	18.76		2	54.05	52.84						2	45.35	30.23		2	14.24	7.81		2	150	81.48		2	150	145.06
10	99.58	62.92		8	74.9	57.3						8	38.75	38.89		10	16.69	27.16		6	85.54	82.85		7	127.1	76.06
20	20.83	29.17		16	100.76	85.85						16	43.61	42.55		20	17.62	15.1		12	52.17	113.06		12	153	66.8
30	22.06	34.62		24	72.02	74.08						24	41.29	33.34		30	12.95	14.22		18	150	106.23		17	113.67	53.8
40	16.03	23.72		32	65.76	71.12						32	35.31	27.89		40	6.2	9.22		24	150	150		22	150	136.52
50	15.95	17.48		40	70.37	75.61						40	49.51	40.34		50	8.79	9.51		30	99.16	150		27	150	150
60	12.77	15.75		48	44.38	53.47						48	21.7	29.08		60	7.01	15.1		36	99.42	36.93		32	150	150
70	18	18.7		56	31.81	40.93						56	51.8	40.87		70	9.37	14.07		42	107.85	96.62		37	150	150
80	27.9	105.83		64	35.05	39.61						64	68.72	64		80	10.7	10.42		48	81.39	41.72		42	116.39	106.48
90	53.06	36.37		72	32.85	33.93						72	33.85	19.56		90	11.99	10.82		54	26.9	80.8
100	27.58	30.31		80	52.75	47.21						80	7.85	10.92						60	21.99	28.85
Green, photo 3				Gilman, photo 3												Britannia, photo 3
Distance from the wall (cm)	Sand depth 1 (mm)	Sand depth 2 (mm)		Distance from the wall (cm)	Sand depth 1 (mm)	Sand depth 2 (mm)										Distance from the wall (cm)	Sand depth 1 (mm)	Sand depth 2 (mm)
2	18.23	34.32		2	97.84	94.42										2	22.06	20.4
10	18.98	33.76		7	115.96	93.04										10	20.25	18.93
20	13.8	18.69		14	28.42	98.62										20	7.5	5.01
30	12.35	25.42		21	119.92	98.43										30	3.88	3.04
40	33.08	36.5		28	73.2	110.13										40	3.18	3.11
50	29.04	34.06		35	64.58	37.11										50	6.57	6.74
60	150	150		42	95.46	33.58										60	7.85	4.5
70	37.36	20.64		49	77.18	42.66										70	3.92	3.63
80	31.25	34.09		56	57.24	44.09										80	3.38	3.44
90	29.66	21.84		63	63	62.25										90	5.08	4.35
100	29.16	30.61		70	150	150										100	2.9	4.85

## Sheet: Areas
Pit areas in the field (and lab) as a function of soil depth and distance from the wall (four sites).
		Distance from the wall			Area
Site	Wormlion #	Distance (cm)	Mass (g)	Soil depth (mm)	Pit field (mm2)	Pit lab (mm2)
Green	1	26	0.0113	24.91	509.755	471.251
Green	2	36	0.0094	12.25	790.186	650.67
Green	3	16.5	0.0064	34.43	622.838	588.711
Green	4	17	0.0031	42.25	275.24	406.754
Green	5	50	0.0073	37.69	475.928	628.087
Green	6	60.5	0.0031	46.78	278.86	296.942
Green	7	76	0.0043	34.23	424.557	722.831
Green	8	92	0.0083	28.53	688.551	632.308
Green	9	8	0.0045	64.1	210.808	522.677
Green	10	16.5	0.0032	21.48	159.148	274.524
Green	11	30.5	0.0059	26.68	354.793	784.404
Green	12	1.5	0.0135	90.53	483.372	996.144
Green	13	1	0.0071	76.35	453.923
Green	14	98.5	0.0052	30.81	428.243	477.425
Green	15	84	0.0099	28.87	320.901	407.109
Green	16	32	0.0094	16.24	182.853	316.984
Green	17	19.5	0.0057	15.86	274.722	461.33
Green	18	15	0.0178	25.02	527.7	875.762
Green	19	10	0.0074	20.69	220.458	271.083
Green	20	7	0.0132	37.1	1066.23	1660.14
Green	21	34	0.0026	25.65	171.382	347.094
Green	22	9	0.0077	28.28	184.425	947.433
Green	23	3	0.0136	32.17	236.231	356.693
Green	24	12	0.0065	15.51	148.212	747.649
Green	25	57	0.0056	35.71	379.599	482.706
Schreiber	26	17	0.012	150	178.69	430.279
Schreiber	27	9	0.0085	38.8	364.789	518.685
Schreiber	28	7	0.0105	150	521.905	677.57
Schreiber	29	22	0.0055	31.47	225.851	426.16
Schreiber	30	13.5	0.004	104.5	171.664	511.964
Schreiber	31	1	0.0086	150	250.718	344.612
Schreiber	32	5.5	0.0084	126.3	239.974	430.486
Schreiber	33	16	0.0148	91.13	231.255	401.901
Schreiber	34	4	0.0077	150	215.01	545.498
Schreiber	35	12	0.0118	78.33	148.393	525.07
Schreiber	36	3	0.006	84.29	99.9791	380.436
Schreiber	37	19.5	0.0102	70.31	232.457	698.236
Schreiber	38	2.5	0.0081	59.49	167.346	281.402
Schreiber	39	21	0.0075	75.12	58.9161	400.043
Schreiber	40	16	0.0156	42.01	499.38	1130.38
Schreiber	41	4	0.0097	19.44	291.441	586.254
Schreiber	42	19.5	0.0166	73.02	90.3705	293.355
Schreiber	43	10	0.0074	85.7	93.4472	473.356
Schreiber	44	5	0.0104	47.64	197.736	515.077
Schreiber	45	8.5	0.0092	69.53	70.4389	594.839
Schreiber	46	30	0.0106	24.06	116.338	1049.82
Schreiber	47	28.5	0.0035	150	92.7528	325.308
Schreiber	48	8.5	0.0151	130.33	420.46	1305.06
Schreiber	49	11	0.0056	62.15	61.1388	550.217
Schreiber	50	0.5	0.0091	29.4	146.194	301.643
Britannia	51	9	0.0058	8.44	166.692	425.273
Britannia	52	0.5	0.002	9.83	157.235	422.938
Britannia	53	3	0.0021	8.05	101.071	320.42
Britannia	54	13	0.0015	6.11	83.2618
Britannia	55	10	0.0019	7.19	102.293	276.17
Britannia	56	8.5	0.0013	2.9	110.436	238.95
Britannia	57	0.5	0.0021	4.39	110.884	415.646
Britannia	58	5	0.0018	3.75	63.4908	312.759
Britannia	59	12.5	0.0016	4.41	87.2603	184.695
Britannia	60	11.5	0.0009	2.96	32.6383	214.612
Britannia	61	5.5	0.0024	7.98	71.4423	325.041
Britannia	62	3	0.0016	8.62	73.6322	312.748
Britannia	63	1	0.0019	9.3	66.3534	486.036
Britannia	64	16	0.0007	5.02	100.432
Britannia	65	9	0.0017	6.97	301.948
Britannia	66	8	0.0008	4.14	60.2321	291.497
Britannia	67	0.5	0.0035	13.03	228.738	640.522
Britannia	68	21	0.0019	6.04	90.0959	349.665
Britannia	69	22	0.0013	5.77	162.446	303.939
Britannia	70	36	0.0006	5.91	35.2269	268.85
Britannia	71	6.5	0.0038	25.56	168.178
Britannia	72	4	0.0017	8.51	88.3549	69.0043
Britannia	73	12	0.001	5.2	67.9125	171.47
Britannia	74	15	0.0014	5.55	89.3067	241.145
Britannia	75	10	0.0016	5.98	66.5358	275.336
Mexico	76	70.5	0.0008	7.36	151.503	208.888
Mexico	77	69	0.0055	17.36	317.354	591.892
Mexico	78	66.5	0.0001	4.44	36.0694	61.0329
Mexico	79	60	0.0005	9.1	100.024	43.1253
Mexico	80	56	0.0028	12.26	99.2219
Mexico	81	50.5	0.0013	18.96	138.13
Mexico	82	36	0.0022	30.17	87.4024	30.2771
Mexico	83	32	0.002	48	119.174	210.113
Mexico	84	26	0.0001	43.77	21.4496
Mexico	85	18	0.0023	53.98	81.4162	140.566
Mexico	86	9	0.0004	30.65	38.9296	87.3018
Mexico	87	4	0.0015	57.43	37.4514	141.267
Mexico	88	6.5	0.0037	48.78	140.239	424.238
Mexico	89	11.5	0.0038	29.19	61.4672	190.136
Mexico	90	24	0.0067	44.01	148.005	516.94
Mexico	91	27	0.0025	34.55	109.85	172.869
Mexico	92	36.5	0.0006	49.05	81.6626	146.679
Mexico	93	45	0.0056	41.09	261.487	692.128
Mexico	94	48.5	0.0121	32.43	257.427	1905.09
Mexico	95	62	0.0024	16.16	78.917
Mexico	96	66	0.006	12.2	280.353	502.225
Mexico	97	75	0.0091	19.29	331.495	1113.72
Mexico	98	83.5	0.0033	9.76	124.116
Mexico	99	1	0.0033	12.35	98.2107	344.051
Mexico	100	3	0.0082	34.67	130.903	798.019

## Sheet: Particles
Soil particle sizes (four sites). Samples were collected either next to the wall (W) or at a distance of 40 cm (F). Each sample was separated to six ranges of particle sizes.
	Gilman	Soil mass (g)
particle size range (µm)	W	F	W	F	W	F	W	F	W	F	W	F	W	F	W	F
> 710	11.6	11.99	9.97	14.95	12.18	19.08	10.28	21.14	10.92	10.52	10.97	10.91	18.39	19.06	13.65	14.33
500-710	3.82	3.48	3.83	6.73	4.34	6.86	3.26	5.57	3.88	3.65	3.32	3.77	4.32	4.65	4.01	3.63
250-500	47.04	46.56	50.61	51.96	50.92	48.14	45.97	46.55	52.35	50.31	36.43	41.55	52.97	58.17	54.31	44.27
106-250	31.19	38.34	31.17	25.94	36.15	26.56	38.6	26.96	35.07	30.66	42.85	42.9	45.52	34.39	37.92	46.47
63-106	4.74	4.12	4.69	2.05	4.66	1.67	4.44	2.2	5.06	4.42	4.5	5.52	4.51	3.71	4.49	4.79
< 63	2.87	2.87	2.25	1.18	2.83	1.29	2.41	1.54	3.29	2.41	3.34	4.18	3.75	3.49	3.77	3.95
	Schreiber
	W	F	W	F	W	F	W	F	W	F	W	F	W	F	W	F
> 710	51.28	38.59	24.74	47.69	31.74	36.56	38.49	38.84	27.51	34.13	18.96	40.98	21.91	26.78	24.4	41.25
500-710	4.14	5.17	3.96	4.84	4.23	4.69	3.84	4.82	4.19	4.28	2.93	4.46	2.79	2.89	3.67	4.42
250-500	30.46	29.65	57.18	31.09	35.35	33.66	38.9	35.45	45.39	32.96	37.12	35.2	36.61	37.29	41.48	26.52
106-250	35.77	35.35	22.21	20.87	48.83	31.99	41.37	31.54	46.75	42.38	53.63	38.35	42.36	39.85	58.75	29.06
63-106	1.95	1.63	1.95	1.36	2.23	1.71	2.19	1.67	2.71	1.76	3.17	1.99	3.73	3.31	3.3	1.64
< 63	1.1	1.34	1.28	1.01	1.82	1.36	1.74	1.45	2.22	1.81	2.97	1.48	3.19	2.89	2.75	1.45
	Green
	W	F	W	F	W	F	W	F	W	F	W	F	W	F	W	F
> 710	25.06	26.84	29.22	20.52	33.7	22.72	22.23	27.77	18.97	19.76	26.26	22.85	24.35	25.76	19.11	25.63
500-710	3.43	4.39	2.14	2.24	3.36	1.85	2.42	2.13	2.79	2.74	2.81	2.59	2.38	2.49	2.1	2.61
250-500	57.51	63.43	43.16	42.33	58.28	45.9	47.46	47.05	57	49.74	50.33	57.56	57.57	55.35	47.11	56.61
106-250	33.45	26.71	33.81	63.51	28.31	50.33	61.09	48.43	44.39	48.96	55.52	52.66	54.75	57.19	59.82	60.56
63-106	1.57	1.33	1.43	1.85	1.6	2.09	2.51	1.59	2.28	1.4	2.1	1.86	1.94	2.56	2.35	1.35
< 63	1.38	1.48	1.44	2.08	1.49	2.27	3.23	1.73	2	1.35	1.8	1.64	2.33	3.04	2.7	1.68
	Mexico
	W	F	W	F	W	F	W	F	W	F	W	F	W	F	W	F
> 710	11.2	17.38	12.11	10.41	10.48	9.65	13.49	15.81	12.04	10.31	11.66	13.18	18.6	26.4	24.45	25.92
500-710	3.45	3.39	3.86	3.9	3.46	3.73	3.42	6.4	4.59	3.96	2.97	3.47	3.74	2.97	4.03	3.39
250-500	54.34	42.93	48.7	51.87	41.21	50.36	54.52	51.62	49.36	54.22	47.73	58.63	47.34	43.43	43.03	41.39
106-250	37.48	44.76	48.69	44.47	44.15	50.95	33.82	37.71	40.91	43.09	47.66	44.64	47.58	48.92	47.57	54.02
63-106	5.99	5.4	6.32	6.07	5.07	7.37	4.75	4.58	4.93	5.48	6.39	6.29	6.58	7.09	5.56	5.81
< 63	3.83	3.67	4.97	5.56	3.54	5.15	3.79	4.37	3.92	5.31	5.15	5.64	6.56	5.73	5.34	4.82

## Sheet: Light
Light measurements during the morning (08:30), afternoon (12:30) and evening (16:30) in all seven sites at positions next to the wall (W) and a distance of 40 cm (F).
Early March 2021
		Light level (Lux)
Time	Site	F	W	F	W	F	W	F	W	F	W
Morning	Green	201.7	240.85	211.2	215.3	224.3	186.65	208.8	251.65	244.35	248.7
	Britannia	2265	1950	2070	930	960	830	910	560	740	670
	Schreiber	213.6	126.3	200.8	139.95	191	163.75	192.1	135.35	132.9	151.7
	Central library	12.45	16.5	9.7	18.4	8.95	11.6	12.25	4.1	103.5	160.8
	Gilman	219.9	250.85	226.05	213.85	246.05	222.8	223.5	270.65	251.15	248.9
	Mexico	138.25	140.5	132.15	117.4	199	108.6	136.45	67.4	137.2	118.8
	Buchmann-Mehta	65.85	83.75	66.8	82.25	54.55	91.7	61.65	70.6	63	64.1
Afternoon	Green	175.9	119.4	197.65	131.5	196.6	129.55	151.85	114	135.3	94.65
	Britannia	13830	11120	10630	8140	10925	5945	9380	6675	9840	6000
	Schreiber	165.9	125.1	153.7	144.7	163.3	154.65	184.1	132.6	174.25	156.95
	Central library	115.1	40	83.2	77.6	71.7	115.95	87	108.9	304.95	370.7
	Gilman	209.2	230.4	189.15	202.25	216	192.05	212.4	207.7	214.25	222.85
	Mexico	139.6	119.95	129.1	114.6	147.95	105.65	133.5	78.45	115.35	99.35
	Buchmann-Mehta	74.25	70.25	77.2	84.7	78.35	100.4	101.3	111.6	131	148.35
Evening	Green	177.6	225.3	209.7	191.2	226.45	210.65	185.5	164.3	148.05	159.8
	Britannia	615	275	505	295	380	275	320	300	345	235
	Schreiber	89.85	69.15	74.2	48.55	54.4	81.35	78.6	72.25	87.9	70.25
	Central library	39.35	36.8	20.25	34.35	30.2	32.8	28.85	49.05	141.25	90
	Gilman	154.75	169	160.5	155.3	152.5	151.8	149.65	145.15	179.05	151.25
	Mexico	48.7	56.15	57.85	47.85	68	45.75	46.2	31.6	39.2	37.7
	Buchmann-Mehta	102.6	146.8	80.2	109.05	49.2	123.45	48.2	67	60.25	83.05
Late May 2021
		Light level (Lux)
Time	Site	F	W	F	W	F	W	F	W	F	W
Morning	Green	168.4	126.7	190	117.2	179.6	107.5	176.7	93.9	178.3	109.3
	Britannia	225.8	132.7	274.6	110	334.1	164.8	381.7	169.6	388.5	228
	Schreiber	213.7	136.2	225	146.5	196.4	131.7	131	107.6	135.7	102.7
	Central library	64.2	67.35	21.2	7.4	23.1	12.4	21.5	18.6	15.5	25.6
	Gilman	282.6	308.3	296.4	299.8	303	239.6	256	231.5	290.2	279.7
	Mexico	196.65	87.6	237.4	142.7	221.8	176.3	188.3	215.8	226.5	237.3
	Buchmann-Mehta	56.2	70.6	55.3	83.5	52.6	71.9	59.3	64.7	42.3	78.6
Afternoon	Green	278.1	219.7	261.7	189.3	235.8	158.9	214.6	125.4	182.1	128.7
	Britannia	7810	5080	9360	4980	13630	7440	16190	8620	19260	7550
	Schreiber	24900	2200	30590	2330	24770	2710	20660	2790	10770	1540
	Central library	97.6	89.7	67	39.3	50.6	65.5	54.9	80.2	36.6	64.2
	Gilman	349.6	291.8	294.6	255.6	229.7	264.2	296.7	287.5	264.9	189.8
	Mexico	127.8	58.1	155	102.5	114.5	132.5	125.4	120.4	128.9	128.1
	Buchmann-Mehta	86.4	85.9	74.7	83.8	65	96	70.3	98.2	71.6	109.1
Evening	Green	7740	635	7245	845	7260	435	6390	410	6405	530
	Britannia	2090	1425	2675	3215	4580	2460	5190	3595	6290	4000
	Schreiber	100.65	48.4	63.1	57.25	66.8	48.6	55.05	35.7	60.3	41.4
	Central library	122.3	96.95	67.25	56.4	70.1	114.25	140.15	141.6	108.95	193.8
	Gilman	383.35	335.95	342.05	312.15	380.5	344.25	340.8	334.35	266.25	317.05
	Mexico	137.4	77.7	144.05	109.6	105.8	111.9	107.5	113.75	99	110.6
	Buchmann-Mehta	1235	7000	1060	1910	335	1445	255	4070	245	985

## Sheet: Arthropods
Arthropod abundance according to pitfall traps (two sites), either next to the wall (W) or at a distance of 40 cm (F).
30 pitfall traps were placed per location (W/F) per site (Green/Schreiber) per day (1/2)
Ant spp. are marked in grey.
Green						Schreiber
	Day 1		Day 2				Day 1		Day 2
	W	F	W	F			W	F	W	F
Wasmannia auropunctata	43	31	66	22		Pheidole spp.	19	72	1	66
Paratrechina longicornis	15	4	12	9		Nylanderia spp.	3	21	2	6
Pheidole spp.	0	0	4	0		Plagiolepis sp.	0	0	1	0
Nylanderia spp.	0	1	0	0		Camponotus sp.	2	2	1	1
Beetles	1	3	1	3		Beetles	9	8	23	10
Spiders	3	0	2	4		Spiders	7	6	3	4
Isopods	5	0	7	0		Isopods	13	12	3	14
Springtails	13	6	13	7		True bugs	0	0	2	2
True bugs	3	9	16	9		Cockroaches	11	6	6	1
Fig wasps (Agaonidae)	2	6	19	12		Embioptera	1	0	0	0
Nematocera	1	0	0	0		Aphids	0	1	0	0
Earwigs	0	0	1	0
Aphids	0	1	1	0		Total ants	24	95	5	73
Acari	0	0	0	1		Total arthropods	65	128	42	104
Unidentified larvae	1	0	0	0
Total ants	58	36	82	31			24	95	5	73
Total arthropods	87	61	142	67			65	128	42	104

## Sheet: Simulation
The simulation model output, all scenarios tested.
Prey directionality = 0.6				Prey directionality = 0.6				Prey directionality = 0.6				Prey directionality = 0.6				Prey directionality = 0.6				Prey directionality = 0.6				Prey directionality = 0.6				Prey directionality = 0.6				Prey directionality = 0.6				Prey directionality = 0.9				Prey directionality = 0.9				Prey directionality = 0.9				Prey directionality = 0.9
Number of prey = 50				Number of prey = 50				Number of prey = 50				Number of prey = 100				Number of prey = 100				Number of prey = 100				Number of prey = 150				Number of prey = 150				Number of prey = 150				Number of prey = 50				Number of prey = 50				Number of prey = 50				Number of prey = 100
Number of predators = 2				Number of predators = 6				Number of predators = 10				Number of predators = 2				Number of predators = 6				Number of predators = 10				Number of predators = 2				Number of predators = 6				Number of predators = 10				Number of predators = 2				Number of predators = 6				Number of predators = 10				Number of predators = 2
Mean	7.7			Mean	1.1667			Mean	0.0533			Mean	15.4			Mean	3.6333			Mean	0.1867			Mean	20.9			Mean	3.8444			Mean	0.7067			Mean	17.3667			Mean	5.5556			Mean	1.9933			Mean	30.7667
CI	5.5667			CI	0.4222			CI	-0.4933			CI	12.7667			CI	2.5111			CI	-0.6867			CI	17.5333			CI	2.0556			CI	-0.2067			CI	15.5667			CI	4.6778			CI	1.3733			CI	28.7667
	9.6				1.8889				0.6267				17.9667				4.6111				1.0067				24				5.6556				1.68				19.2333				6.3556				2.6533				33.0667
Wall	Far	Δsuccess		Wall	Far	Δsuccess		Wall	Far	Δsuccess		Wall	Far	Δsuccess		Wall	Far	Δsuccess		Wall	Far	Δsuccess		Wall	Far	Δsuccess		Wall	Far	Δsuccess		Wall	Far	Δsuccess		Wall	Far	Δsuccess		Wall	Far	Δsuccess		Wall	Far	Δsuccess		Wall	Far
11	2	9		2.66667	4.66667	-2		3	2	1		30	9	21		8.66667	7	1.66667		5.4	5	0.4		28	8	20		9.66667	5.66667	4		11.4	9	2.4		22	3	19		8.33333	1.33333	7		6.4	3	3.4		38	2
11	15	-4		4	3	1		4.2	4.4	-0.2		24	17	7		10.6667	8	2.66667		7.6	6.2	1.4		35	11	24		17	6.33333	10.6667		11.2	11.8	-0.6		21	2	19		10	3	7		6.2	2.2	4		35	4
16	9	7		5.33333	7.33333	-2		3.6	4.6	-1		25	8	17		12.3333	12.3333	0		7.8	7.4	0.4		15	22	-7		10.6667	10	0.666667		8.8	8.8	0		20	4	16		11	2.33333	8.66667		6.2	6.6	-0.4		32	9
5	0	5		4	3	1		3.8	3.4	0.4		26	11	15		11.6667	3.66667	8		8	6	2		25	14	11		13.6667	7	6.66667		7.4	5.8	1.6		17	7	10		7.33333	2	5.33333		6.6	5.8	0.8		31	3
14	3	11		4	1.33333	2.66667		2.6	5.8	-3.2		19	4	15		12.6667	16	-3.33333		5.8	7.6	-1.8		34	8	26		20.3333	11	9.33333		9	10.4	-1.4		15	5	10		9.33333	3.66667	5.66667		5.8	5.8	0		37	10
11	5	6		4	5.33333	-1.33333		2.6	3.2	-0.6		25	16	9		9.66667	5.33333	4.33333		9	7.2	1.8		30	6	24		12.6667	15.6667	-3		12.2	8.2	4		24	2	22		7.33333	3.66667	3.66667		7.8	8.6	-0.8		37	6
9	16	-7		5.33333	2	3.33333		3.6	5.8	-2.2		20	3	17		11	3.66667	7.33333		7	7.2	-0.2		25	2	23		18.3333	11.6667	6.66667		10.2	6.4	3.8		24	3	21		7.33333	2.33333	5		6	6.8	-0.8		36	8
17	6	11		3.66667	2.66667	1		2.6	1.4	1.2		17	1	16		12	7	5		5.8	6.4	-0.6		32	16	16		10	9.33333	0.666667		13.6	8.4	5.2		19	2	17		7.33333	7.66667	-0.333333		4.4	3	1.4		32	6
12	3	9		5.66667	2.33333	3.33333		4.6	2	2.6		15	16	-1		12	5.66667	6.33333		3.4	8.6	-5.2		37	14	23		15	8.66667	6.33333		10.8	11.2	-0.4		18	2	16		7.66667	5	2.66667		9.6	7.8	1.8		37	8
11	2	9		3.33333	2.33333	1		3.4	4.4	-1		26	7	19		12	9	3		6	7.2	-1.2		22	6	16		20.3333	19	1.33333		12.4	9	3.4		17	2	15		10	4	6		4.6	3.2	1.4		39	7
15	2	13		5.66667	5.33333	0.333333		4.2	2.8	1.4		21	2	19		7.33333	5.66667	1.66667		6.8	3.4	3.4		37	9	28		14	18.3333	-4.33333		10.2	10.8	-0.6		17	3	14		9	1.66667	7.33333		6.6	2.6	4		40	4
9	10	-1		3.66667	1.66667	2		2	4	-2		21	5	16		11	5.33333	5.66667		7	5.6	1.4		31	5	26		10.3333	5	5.33333		9.2	11.2	-2		22	7	15		10	4	6		6	5.6	0.4		35	7
14	6	8		5.33333	1	4.33333		4	5	-1		31	7	24		14	6.66667	7.33333		7.4	3.4	4		27	6	21		15.3333	11.3333	4		4.8	10.6	-5.8		19	4	15		9	3.33333	5.66667		9	4	5		50	4
14	12	2		6	2.66667	3.33333		3.6	1.4	2.2		15	15	0		12.3333	5.33333	7		6.8	4	2.8		35	8	27		13.6667	13	0.666667		9.6	11.2	-1.6		24	1	23		7.66667	4.33333	3.33333		8	4	4		41	10
20	1	19		3.33333	1.66667	1.66667		3	2.2	0.8		23	6	17		10	5	5		8.2	8	0.2		46	11	35		16.3333	13	3.33333		9.4	9.8	-0.4		22	1	21		11	1	10		6	4	2		32	11
7	0	7		2.66667	1	1.66667		2.6	5.8	-3.2		25	12	13		4.66667	5.66667	-1		6.4	4.4	2		40	14	26		15.6667	14	1.66667		5.6	7.2	-1.6		16	1	15		11	4	7		4.4	3.2	1.2		28	2
17	3	14		3.66667	3.33333	0.333333		2.4	2.6	-0.2		24	9	15		8.66667	2.33333	6.33333		7.4	11.8	-4.4		30	10	20		15	8.66667	6.33333		10	11.4	-1.4		25	5	20		7.33333	2.33333	5		5	2.6	2.4		41	6
6	4	2		3	6.33333	-3.33333		4	1.8	2.2		24	7	17		8	9.33333	-1.33333		8	11.2	-3.2		49	15	34		12.3333	16.3333	-4		9.4	10.8	-1.4		23	4	19		8.33333	4.66667	3.66667		6.4	5	1.4		35	5
13	0	13		4.33333	3.66667	0.666667		5.8	4.4	1.4		25	1	24		13.3333	7.66667	5.66667		5.2	6.2	-1		34	22	12		16	13	3		8.4	7.8	0.6		14	0	14		6.33333	5.66667	0.666667		3.8	4.6	-0.8		33	4
11	4	7		3.66667	3.66667	0		3.8	2.8	1		13	6	7		7.66667	2.66667	5		5.8	6.6	-0.8		24	18	6		13.3333	19	-5.66667		12	10.8	1.2		17	7	10		9.66667	2.66667	7		9	3	6		42	5
10	5	5		8	2.66667	5.33333		2.4	3.6	-1.2		25	13	12		10.6667	6.33333	4.33333		6.4	4.6	1.8		31	11	20		17.6667	8	9.66667		11.6	6.2	5.4		19	5	14		8.66667	6.66667	2		7	3.8	3.2		49	4
13	2	11		4.66667	2.66667	2		2	3.2	-1.2		24	7	17		8.66667	5.66667	3		4.4	7.4	-3		19	5	14		15.3333	9.33333	6		10.6	9.2	1.4		18	0	18		9.66667	3	6.66667		4.8	3.4	1.4		32	7
13	7	6		4	1.33333	2.66667		3.8	1.8	2		32	5	27		9.33333	4.66667	4.66667		9	3.4	5.6		38	9	29		16.6667	11	5.66667		10.8	10.4	0.4		28	1	27		8.33333	2.33333	6		6.2	4.8	1.4		40	3
12	12	0		4.66667	2.33333	2.33333		3	1.8	1.2		29	13	16		7.66667	5.33333	2.33333		3.4	4.6	-1.2		36	28	8		20	9.33333	10.6667		12.2	5.8	6.4		19	3	16		10.3333	2.33333	8		4.8	4.6	0.2		40	7
21	5	16		3	5.66667	-2.66667		3.6	2.6	1		19	1	18		8	4.33333	3.66667		8.2	8.4	-0.2		34	4	30		14	19.3333	-5.33333		11.6	12.2	-0.6		21	1	20		9	2.33333	6.66667		7	3.2	3.8		34	8
12	3	9		5.66667	3.66667	2		4.4	3.2	1.2		12	2	10		7.33333	3.66667	3.66667		5.8	5.8	0		33	10	23		17.6667	4.66667	13		7.6	9.6	-2		17	2	15		12.3333	3.33333	9		6.4	4	2.4		31	7
12	2	10		5.66667	3.33333	2.33333		3.4	3.2	0.2		31	0	31		10	3.66667	6.33333		7.8	5.4	2.4		30	10	20		16	14.6667	1.33333		13.2	15	-1.8		21	3	18		7.33333	4	3.33333		5.2	2.4	2.8		26	2
15	0	15		3.66667	4.33333	-0.666667		2.2	2.4	-0.2		20	2	18		6.66667	8.33333	-1.66667		6	9.4	-3.4		29	5	24		15	5.33333	9.66667		8.8	7.8	1		31	1	30		9.66667	3	6.66667		7.6	2.6	5		30	3
13	1	12		4.66667	2.66667	2		2.2	2.8	-0.6		25	4	21		9.66667	8.66667	1		8.2	7.2	1		31	16	15		12.6667	7.66667	5		11.8	7.4	4.4		28	2	26		10.6667	3.33333	7.33333		5.4	3.4	2		34	4
10	3	7		3.66667	3	0.666667		3.8	4.2	-0.4		9	4	5		12	6.66667	5.33333		7.6	6.4	1.2		35	2	33		15.3333	9.33333	6		8.6	7	1.6		10	4	6		7.66667	3	4.66667		4.8	3.6	1.2		45	3
Prey directionality = 0.6				Prey directionality = 0.6				Prey directionality = 0.9				Prey directionality = 0.9				Prey directionality = 0.6				Prey directionality = 0.6				Prey directionality = 0.9				Prey directionality = 0.9
Number of prey = 100				Number of prey = 100				Number of prey = 100				Number of prey = 100				Number of prey = 100				Number of prey = 100				Number of prey = 100				Number of prey = 100
Number of predators = 6				Number of predators = 6				Number of predators = 6				Number of predators = 6				Number of predators = 10				Number of predators = 10				Number of predators = 10				Number of predators = 10
Predators next to the wall = 2				Predators next to the wall = 4				Predators next to the wall = 2				Predators next to the wall = 4				Predators next to the wall = 3				Predators next to the wall = 7				Predators next to the wall = 3				Predators next to the wall = 7
Mean	6.625			Mean	1.225			Mean	16.925			Mean	7.1			Mean	3.9095			Mean	-1.4111			Mean	10.7825			Mean	1.9714
CI	4.9833			CI	-0.1833			CI	15.1333			CI	5.1083			CI	2.7937			CI	-2.2825			CI	8.927			CI	0.4794
	8.15				2.625				18.775				8.875				5.0238				-0.5683				12.6603				3.3397
Wall	Far	Δsuccess		Wall	Far	Δsuccess		Wall	Far	Δsuccess		Wall	Far	Δsuccess		Wall	Far	Δsuccess		Wall	Far	Δsuccess		Wall	Far	Δsuccess		Wall	Far	Δsuccess
13.5	2.5	11		4.75	3	1.75		27	7	20		10.75	1.5	9.25		13	7	6		4.71429	7.66667	-2.95238		21.3333	7.57143	13.7619		9.57143	6	3.57143
13	7.5	5.5		7.75	5.5	2.25		16.5	3.75	12.75		17.75	6.5	11.25		13.6667	6	7.66667		3.71429	6.66667	-2.95238		19.3333	5.28571	14.0476		9.71429	5.33333	4.38095
13	5.75	7.25		8.25	0	8.25		25	8	17		14	4.5	9.5		11	9	2		5.71429	5.33333	0.380952		21.6667	10.2857	11.381		10.8571	16.3333	-5.47619
10.5	8	2.5		7.75	0	7.75		21	5.25	15.75		13.25	10	3.25		16.6667	7.14286	9.52381		3	5	-2		14.3333	9.57143	4.7619		7.28571	17	-9.71429
17.5	5	12.5		10.75	5.5	5.25		25	6.5	18.5		19.25	7	12.25		7.66667	8.28571	-0.619048		4	5.66667	-1.66667		14.6667	7.71429	6.95238		10.7143	7.33333	3.38095
9	10	-1		4	3.5	0.5		23.5	3.75	19.75		12.25	6.5	5.75		12.3333	9.57143	2.7619		6.85714	4.66667	2.19048		16	14.8571	1.14286		11.8571	4	7.85714
15.5	4	11.5		5.5	1	4.5		17.5	3.75	13.75		14.25	8.5	5.75		10	5.57143	4.42857		5.42857	11.6667	-6.2381		16.6667	7.85714	8.80952		10.4286	8	2.42857
21.5	7.75	13.75		6.5	3.5	3		26	7	19		12.25	8	4.25		10	9.28571	0.714286		4.42857	4.33333	0.0952381		25.3333	8.42857	16.9048		12	5	7
9.5	8	1.5		6.75	10	-3.25		17.5	8	9.5		19.25	4.5	14.75		11	8.42857	2.57143		6.71429	5	1.71429		15.6667	4.57143	11.0952		8.42857	8	0.428571
13	5.5	7.5		5.75	11	-5.25		27.5	12	15.5		16.25	5.5	10.75		12.6667	5.85714	6.80952		3.85714	4.33333	-0.47619		23	8.71429	14.2857		11.8571	19.3333	-7.47619
16	4	12		7	1.5	5.5		27	8.75	18.25		18	5	13		9	7.28571	1.71429		6.28571	4.66667	1.61905		17	5.42857	11.5714		9	6	3
12	6	6		7	10.5	-3.5		23	12.5	10.5		17.5	8.5	9		7.33333	9	-1.66667		4.85714	3.33333	1.52381		15.3333	5.85714	9.47619		10.2857	12.6667	-2.38095
12.5	4.25	8.25		6.75	7	-0.25		21	6	15		11.25	12.5	-1.25		13	5.14286	7.85714		5.42857	9.33333	-3.90476		17.6667	10	7.66667		10.8571	12.6667	-1.80952
10.5	7	3.5		10	4	6		27.5	4.75	22.75		21.25	21	0.25		13	11.1429	1.85714		6.28571	8.33333	-2.04762		18.3333	7.28571	11.0476		7.42857	7	0.428571
10	12.25	-2.25		9.25	10.5	-1.25		26.5	8.5	18		11.75	13.5	-1.75		7.66667	5.71429	1.95238		5	8.33333	-3.33333		17.6667	5.71429	11.9524		9.28571	4	5.28571
17.5	5	12.5		6.25	7	-0.75		24.5	11.25	13.25		18.5	15.5	3		13.6667	7.85714	5.80952		4.28571	7.33333	-3.04762		18	12.7143	5.28571		9.14286	11	-1.85714
8.5	8	0.5		7.25	5	2.25		26.5	5.25	21.25		16.75	2.5	14.25		11.6667	4.85714	6.80952		5.85714	7	-1.14286		12.6667	14.1429	-1.47619		9.85714	5.33333	4.52381
10	4	6		5.5	1.5	4		18.5	6.75	11.75		14.25	16	-1.75		11.3333	6.42857	4.90476		6.28571	7.33333	-1.04762		18.3333	7.71429	10.619		10.4286	4.66667	5.7619
11.5	9	2.5		9.25	4.5	4.75		28	6.5	21.5		13.75	8.5	5.25		10	9.71429	0.285714		3.42857	5.66667	-2.2381		26.3333	6.71429	19.619		8.28571	5.66667	2.61905
16.5	8	8.5		9.25	14.5	-5.25		33	7	26		14.5	7.5	7		11.3333	10	1.33333		4.14286	4.66667	-0.52381		24	7.14286	16.8571		10.1429	7.66667	2.47619
15	9	6		7.75	6	1.75		29.5	4.5	25		19	7	12		9.33333	4.71429	4.61905		5.57143	6.66667	-1.09524		21.3333	8.57143	12.7619		7	6.66667	0.333333
18.5	3.75	14.75		9.25	10.5	-1.25		22.5	5.75	16.75		16.5	5.5	11		11	4.42857	6.57143		5.71429	6	-0.285714		8.66667	9	-0.333333		9.57143	7.66667	1.90476
11.5	12.25	-0.75		7	6.5	0.5		18.5	7.5	11		16.75	8.5	8.25		13	10.8571	2.14286		2.85714	5.66667	-2.80952		22.3333	10	12.3333		10.5714	6.33333	4.2381
11.5	3.5	8		7.75	3	4.75		26	7.5	18.5		14.75	21.5	-6.75		8.33333	7.71429	0.619048		7.57143	5.66667	1.90476		21.3333	6.14286	15.1905		10.5714	3.66667	6.90476
13	5.75	7.25		7.75	10	-2.25		20	7.5	12.5		13	5.5	7.5		17.6667	8.14286	9.52381		4.71429	6.33333	-1.61905		16.3333	10.1429	6.19048		13.4286	8	5.42857
15	6.25	8.75		10	3	7		28	6	22		12.75	5.5	7.25		11.3333	2.57143	8.7619		4.28571	3.33333	0.952381		16.6667	6.57143	10.0952		6.57143	6.66667	-0.0952381
10.5	11.5	-1		4.75	7.5	-2.75		22	19	3		16.5	6	10.5		10	7.28571	2.71429		4.85714	8.33333	-3.47619		23.6667	7.14286	16.5238		10.4286	6.66667	3.7619
15.5	3	12.5		6.75	14	-7.25		21	5.5	15.5		15	4	11		12.3333	8.57143	3.7619		4.28571	10.3333	-6.04762		20	7.28571	12.7143		11.1429	8.66667	2.47619
13	8	5		6.75	8	-1.25		24	8.75	15.25		15	5	10		12	6.85714	5.14286		5.28571	3.33333	1.95238		23.3333	8	15.3333		11.5714	7	4.57143
15.5	6.75	8.75		7.25	6	1.25		32	3.5	28.5		16	7.5	8.5		8	7.28571	0.714286		4.57143	10.3333	-5.7619		23.3333	6.42857	16.9048		10.8571	5.66667	5.19048
[truncated: 16 more columns]

## Sheet: Relocations
Wormlion relocation distances as a function of initial position next to the wall or at a distance of 40 cm (an experiment with four replications).
Replication #	Initial location (1=wall, 0=distant)	Distance moved (cm)	Movement direction (1=to the wall, 0=away from the wall)
1	1	1.04965
1	1	0.93915
1	1	0.88385
1	1	0.05525
1	1	0.82865
1	1	1.43635
1	1	0.49715
1	1	0.27615
1	1	0.38665
1	1	0.55245
1	1	0.16575
1	1	0.44195
1	1	0.22095
1	1	0.33145
1	0	13.7555	0
1	0	14.5289	0
1	0	3.59075	0
1	0	3.14895	1
1	0	5.19285	0
1	0	0.93915	0
1	0	0.16575	1
1	0	2.04395	0
1	0	1.71255	0
1	0	19.8877	1
1	0	0.44195	0
1	0	5.91105	0
1	0	8.67315	0
1	0	1.38105	0
2	1	3.84955
2	1	0.81795
2	1	0.68065
2	1	0.26885
2	1	2.28225
2	1	0.08575
2	1	0.90945
2	1	4.79915
2	1	0.54335
2	1	2.32805
2	1	2.83145
2	1	14.592
2	1	0.70355
2	0	4.4788	1
2	0	1.9162	0
2	0	6.7783	1
2	0	2.8429	1
2	0	3.4835	1
2	0	9.421	0
2	0	0.7379	1
2	0	2.9344	1
2	0	7.9566	0
2	0	0.9209	1
2	0	0.8294	1
2	0	11.8005	0
2	0	4.5703	0
2	0	1.0125	1
2	0	0.0972	1
2	0	5.1309	1
2	0	2.2022	1
2	0	1.4586	0
2	0	1.001	0
3	1	1.5179
3	1	1.3274
3	1	8.3754
3	1	6.6611
3	1	1.6132
3	1	1.7084
3	1	1.6132
3	1	1.7084
3	1	2.0894
3	1	1.5179
3	1	5.0419
3	1	1.7084
3	1	1.4227
3	1	1.6132
3	1	1.6132
3	1	1.4227
3	1	6.5658
3	1	1.3274
3	1	1.2322
3	1	3.1371
3	0	0.1012	1
3	0	1.1489	1
3	0	8.1969	1
3	0	0.5655	0
3	0	2.5976	1
3	0	3.2919	1
3	0	5.4349	1
3	0	1.3512	0
3	0	19.9237	0
3	0	4.1967	1
3	0	11.2923	1
3	0	11.9114	1
3	0	6.3277	0
3	0	0.9584	1
3	0	4.3276	0
3	0	0.4584	1
3	0	0.7441	1
3	0	2.3989	0
3	0	2.0299	1
3	0	0.4584	1
4	1	1.72315
4	1	1.72315
4	1	0.71855
4	1	0.71855
4	1	0.94175
4	1	0.49535
4	1	0.83015
4	1	0.16045
4	1	0.94175
4	1	0.49535
4	1	0.06275
4	1	0.60695
4	1	0.17435
4	1	4.51355
4	1	0.17435
4	1	0.28595
4	1	0.17435
4	1	0.39765
4	1	0.06275
4	1	7.41565
4	0	1.3882	1
4	0	11.5594	1
4	0	2.0719	1
4	0	1.179	1
4	0	5.9785	1
4	0	9.7735	1
4	0	15.466	1
4	0	24.8419	1
4	0	0.3837	0
4	0	4.4159	1
4	0	9.1038	1
4	0	3.0765	1
4	0	2.1696	0
4	0	4.7507	1
4	0	0.1744	1
4	0	7.4156	0
4	0	1.8487	1
4	0	4.4159	1
4	0	7.2063	1
4	0	5.1832	0
